# Supplementary material
Source: Springer Nature journal article supplement (https://www.springermedizin.de/resource/supplementary/12913_2007_468_MOESM5_ESM.pdf/9534830)
Supplement: MOESM5 [file 9534830]

| <b>Performance objectives for the employee.</b>                                               | <b>Learning objectives</b>                        |                                              |                                                                                                                                                                                                                                           |
|-----------------------------------------------------------------------------------------------|---------------------------------------------------|----------------------------------------------|-------------------------------------------------------------------------------------------------------------------------------------------------------------------------------------------------------------------------------------------|
|                                                                                               | <b>Risk perception and knowledge</b>              | <b>Self-efficacy</b>                         | <b>Skills</b>                                                                                                                                                                                                                             |
| Employee is able to identify and prioritise solutions for obstacles for a safe and early RTW. | Employee learns about possible solutions for RTW. | Employee dares to explain solutions for RTW. | <p>Employee thinks in broad outline and free associative for solutions.</p> <p>Employee explains solutions to supervisor and RTW-coordinator.</p> <p>Employee respects solutions for RTW explained by supervisor and RTW-coordinator.</p> |
